# Supplementary material for: Linking Cell Dynamics With Gene Coexpression Networks to Characterize Key Events in Chronic Virus Infections
Source: Front Immunol. 2019 May 3;10:1002. doi: 10.3389/fimmu.2019.01002 (PMC6509617; doi:10.3389/fimmu.2019.01002)
Supplement: Supplementary file 2 [file Table_2.xlsx]

## Sheet: Legend
Supplementary Table S2. List of DCQ-predicted cell subsets that correlates in their kinetics with the module eigengene of acute-brown (cells with a Pearson’s correlation higher than 0.5 are shown) or chronic-darkturquoise (cells with a Pearson’s correlation higher than 0.3 are shown).

## Sheet: Supp Table S2
Acute-brown				Chronic-darkturquoise
Cell type name	Correlation	P-Value		Cell type name	Correlation	P-Value
MF.MHCII-480int, Thio-5d (PC)	0.966783	0.000379381		T.CD8+EFF, OT-I & LIS-12h (Sp)	0.8483	0.0158372
MF.MHCII-F4/80hi, Thio-5d (PC)	0.937977	0.00177928		T.CD8+EFF, OT-I & LIS-24h (Sp)	0.787261	0.0356199
T.CD8+EFF, OT-I & LIS-8d (Sp)	0.937831	0.00178968		T.CD8+EFF, OT-I & LIS-48h (Sp)	0.602949	0.151824
MF.MHCII+480int, Thio-5d (PC)	0.931024	0.00231189		preT.DN3A (Th)	0.593282	0.160271
T.CD8+EFF, OT-I & LIS-6d (Sp)	0.928553	0.00252108		Mo.Ly6C+MHCII+ (BL)	0.495405	0.25826
Mo.Ly6C-MHCII- (BL)	0.926568	0.00269689		Mo.Ly6C+MHCII- (BL)	0.458964	0.30024
Tgd.vg5+.act.IEL (SI)	0.914806	0.00388476		NKT.CD4+ (Lv)	0.446418	0.315339
T.CD8+EFF, OT-I & VSV-8d (Sp)	0.908634	0.00461123		B.GC (Sp)	0.43138	0.333859
T.CD8+EFF, OT-I & VSV-5d (Sp)	0.907822	0.00471229		NK, H+.MCMV-1d (Sp)	0.415145	0.354356
T.CD8+EFF, OT-I & VSV-6d (Sp)	0.902678	0.00538214		NK, H+.MCMV-7d (Sp)	0.410121	0.360802
Mo.Ly6C-MHCIIint (BL)	0.897832	0.0060611		B1A (PC)	0.405427	0.366868
Tgd.vg5+.IEL (SI)	0.886084	0.00790463		NK, MCMV-1d (Sp)	0.39506	0.380412
MF.II-480hi (PC)	0.856819	0.0137725		T.CD4+NVE (Sp)	0.39447	0.381191
MF.MHCII+480lo, Thio-5d (PC)	0.853635	0.014525		NK.49H+ (Sp)	0.36496	0.420849
Tgd.vg5-.act.IEL (SI)	0.845893	0.0164506		Mo.Ly6C-MHCII+ (BL)	0.359853	0.427868
Mo.Ly6C-MHCII- (BM)	0.819508	0.0240579		NK, MCMV-7d (Sp)	0.346999	0.445732
T.CD8+MEM, OT-I & LIS-100d (Sp)	0.815285	0.0254286		NKT.CD4+ (Lv)	0.322127	0.481066
NKT.CD4- (Sp)	0.813368	0.0260649		MF.II+480lo (PC)	0.314027	0.492783
Mo.Ly6C+MHCII- (BM)	0.769622	0.0430267
Mo.Ly6C-MHCII+ (BL)	0.769396	0.0431268
GN, UrAc (PC)	0.761464	0.0467153
GN, Thio (PC)	0.760698	0.0470704
NKT.CD4+ (Lv)	0.756496	0.0490435
cDC.CD103-CD11b+F4/80lo (Kd)	0.704712	0.0770317
MF.II-480hi (PC)	0.671096	0.0988509
GN (BL)	0.655406	0.110016
GN.ARTH (SynF)	0.622624	0.135341
T.CD8+EFF, OT-I & VSV-15d (Sp)	0.616637	0.140256
Tgd.vg1+vd6+24ahi (Th)	0.536724	0.214187
cDC.CD103+CD11b- (Lu)	0.534415	0.216547
T.CD8+EFF, OT-I & LIS-48h (Sp)	0.521077	0.230424
preT.DN3A (Th)	0.511294	0.240858
NKT.CD4+ (Lv)	0.510167	0.242073
