# Supplementary material for: Linking Cell Dynamics With Gene Coexpression Networks to Characterize Key Events in Chronic Virus Infections
Source: Front Immunol. 2019 May 3;10:1002. doi: 10.3389/fimmu.2019.01002 (PMC6509617; doi:10.3389/fimmu.2019.01002)
Supplement: Supplementary file 3 [file Table_3.xlsx]

## Sheet: Legend
Supplementary Table S3. List of hub genes from acute-brown module that overlap with genes that are upregulated in CD8+ T cells (A) and monocytes/macrophages (B) at day 7 postinfection versus non-infected mice. For each gene the adjusted P-Value (false discovery rate) and the Log2 Fold-Change are shown.

## Sheet: Supp Table S3
A. Genes overlapping between acute-brown module and CD8+ T cells					B. Genes overlapping between acute-brown module and Monocytes/Macrophages
EnsemblGeneID	Gene Symbol	Log Fold Change	Adjusted P-Value		EnsemblGeneID	Gene Symbol	Log Fold Change	Adjusted P-Value
ENSMUSG00000001105	Ift20	0.567426	0.0127481		ENSMUSG00000002190	Clgn	10.3313	1.54827e-10
ENSMUSG00000002014	Ssr4	0.799204	0.00259455		ENSMUSG00000002274	Metrn	1.5109	4.52767e-05
ENSMUSG00000002190	Clgn	4.66816	3.04878e-05		ENSMUSG00000002778	Kdelr1	0.390552	0.0237512
ENSMUSG00000002274	Metrn	1.05502	0.0094093		ENSMUSG00000002957	Ap2a2	0.760584	2.89946e-05
ENSMUSG00000003948	Mmd	0.729429	0.0131688		ENSMUSG00000003644	Rps6ka1	0.619145	5.79489e-12
ENSMUSG00000004610	Etfb	1.37882	9.54235e-05		ENSMUSG00000003948	Mmd	1.53516	5.17478e-09
ENSMUSG00000004814	Ccl24	2.14566	0.0138462		ENSMUSG00000004610	Etfb	2.43186	1.76012e-13
ENSMUSG00000005763	Cd247	1.1002	0.00560093		ENSMUSG00000004814	Ccl24	4.64519	0.0118663
ENSMUSG00000006179	Prss16	2.51342	1.19677e-06		ENSMUSG00000006179	Prss16	6.10339	3.68675e-32
ENSMUSG00000006313	Upk1a	3.11006	0.000380463		ENSMUSG00000006313	Upk1a	3.17013	6.70456e-05
ENSMUSG00000006378	Gcat	2.33714	0.00209299		ENSMUSG00000006378	Gcat	3.94813	1.96601e-08
ENSMUSG00000007021	Syngr3	6.10273	0.00192561		ENSMUSG00000007021	Syngr3	9.97182	4.07302e-08
ENSMUSG00000009563	Tor2a	0.476509	0.03424		ENSMUSG00000009092	Derl3	2.88548	3.74062e-05
ENSMUSG00000016024	Lbp	2.15663	2.20983e-05		ENSMUSG00000009563	Tor2a	0.431021	0.0425097
ENSMUSG00000016427	Ndufa1	0.677806	0.00472436		ENSMUSG00000016427	Ndufa1	1.23497	1.96297e-08
ENSMUSG00000016541	Atxn10	0.882519	4.96831e-05		ENSMUSG00000016541	Atxn10	0.83972	6.45458e-05
ENSMUSG00000018548	Trim37	0.522247	0.000532949		ENSMUSG00000018548	Trim37	1.77976	2.35242e-41
ENSMUSG00000019312	Grb7	4.20784	4.85167e-12		ENSMUSG00000018927	Ccl6	1.11159	0.00223651
ENSMUSG00000019802	Sec63	0.604732	0.0026549		ENSMUSG00000019312	Grb7	5.03088	3.76978e-19
ENSMUSG00000019889	Ptprk	4.41964	3.80308e-16		ENSMUSG00000019889	Ptprk	2.79096	6.83605e-10
ENSMUSG00000019987	Arg1	7.892	1.30489e-14		ENSMUSG00000019987	Arg1	7.10983	1.41433e-05
ENSMUSG00000020020	Usp44	9.14795	1.40243e-07		ENSMUSG00000019988	Nedd1	0.998388	2.39636e-12
ENSMUSG00000020401	Fam71b	2.838	4.46744e-12		ENSMUSG00000020020	Usp44	8.22978	1.28537e-06
ENSMUSG00000021866	Anxa11	0.48979	3.61585e-05		ENSMUSG00000020399	Havcr2	7.65908	4.03348e-236
ENSMUSG00000022338	Eny2	0.854236	0.000157268		ENSMUSG00000020592	Sdc1	3.94488	1.21725e-08
ENSMUSG00000022667	Cd200r1	0.738358	0.028295		ENSMUSG00000021065	Fut8	1.70461	5.27214e-46
ENSMUSG00000022803	Popdc2	5.7424	3.59471e-13		ENSMUSG00000021108	Prkch	0.329511	0.0494774
ENSMUSG00000023830	Igf2r	1.77125	2.3525e-32		ENSMUSG00000021629	Slc30a5	0.464876	0.0177044
ENSMUSG00000023909	Paqr4	2.59497	5.50999e-09		ENSMUSG00000021676	Iqgap2	0.821653	0.0168325
ENSMUSG00000024033	Rsph1	4.47079	0.0121683		ENSMUSG00000021785	Ngly1	0.735017	2.89845e-05
ENSMUSG00000025154	Arhgap19	1.34371	1.21302e-05		ENSMUSG00000021866	Anxa11	0.837211	4.74622e-14
ENSMUSG00000025968	Ndufs1	0.258069	0.0344767		ENSMUSG00000022106	Rcbtb2	0.460705	0.0160346
ENSMUSG00000026012	Cd28	1.01655	4.78435e-08		ENSMUSG00000022186	Oxct1	0.470716	0.000228526
ENSMUSG00000026070	Il18r1	3.52069	3.80701e-34		ENSMUSG00000022498	Txndc11	0.442113	0.00991759
ENSMUSG00000026117	Zap70	1.48353	9.3071e-05		ENSMUSG00000022533	Atp13a3	0.728926	0.00822331
ENSMUSG00000026427	Eif2d	1.15455	5.10719e-06		ENSMUSG00000022723	Crybg3	3.99822	6.81721e-29
ENSMUSG00000026778	Prkcq	0.920833	0.00115757		ENSMUSG00000022803	Popdc2	7.12412	7.64267e-25
ENSMUSG00000027006	Dnajc10	0.481926	0.0449044		ENSMUSG00000023830	Igf2r	1.54357	1.25813e-26
ENSMUSG00000027456	Sdcbp2	3.06844	9.57661e-09		ENSMUSG00000023909	Paqr4	4.56979	4.38695e-27
ENSMUSG00000028218	Fam92a	2.1149	5.37339e-05		ENSMUSG00000024033	Rsph1	5.62588	0.000742745
ENSMUSG00000028551	Cdkn2c	0.947986	0.0230232		ENSMUSG00000024556	Me2	1.50886	3.14032e-38
ENSMUSG00000029026	Trp73	4.88217	1.48537e-05		ENSMUSG00000024725	Ostf1	0.882685	1.88802e-12
ENSMUSG00000029121	Crmp1	3.87401	9.51995e-17		ENSMUSG00000024870	Rab1b	0.751335	8.82201e-10
ENSMUSG00000029153	Ociad2	5.96006	0.00306028		ENSMUSG00000025068	Gsto1	2.20607	5.60996e-18
ENSMUSG00000029253	Cenpc1	0.635714	0.0345192		ENSMUSG00000025154	Arhgap19	4.78164	1.91713e-62
ENSMUSG00000029276	Glmn	1.46577	0.000294138		ENSMUSG00000025227	Tmem180	4.14258	3.58387e-17
ENSMUSG00000029463	Fam216a	1.60291	6.11489e-05		ENSMUSG00000025381	Cnpy2	0.951393	2.83152e-07
ENSMUSG00000029658	Wdr95	6.20063	6.00987e-14		ENSMUSG00000025465	Echs1	0.859928	1.65152e-09
ENSMUSG00000030064	Frmd4b	1.04678	1.19804e-05		ENSMUSG00000025474	Tubgcp2	1.51294	1.23753e-09
ENSMUSG00000030616	Sytl2	2.34754	3.37401e-19		ENSMUSG00000025534	Gusb	0.409166	0.0140836
ENSMUSG00000031871	Cdh5	1.84179	0.010909		ENSMUSG00000025786	Zdhhc3	0.68119	7.16766e-10
ENSMUSG00000032011	Thy1	2.07042	8.01214e-08		ENSMUSG00000025809	Itgb1	2.95784	1.5916e-48
ENSMUSG00000032020	Ubash3b	0.840734	6.10637e-05		ENSMUSG00000025810	Nrp1	4.70186	5.45145e-18
ENSMUSG00000032093	Cd3e	1.11934	0.00210598		ENSMUSG00000025968	Ndufs1	0.664338	5.26677e-10
ENSMUSG00000032094	Cd3d	1.44965	0.00120785		ENSMUSG00000026012	Cd28	1.29284	9.79992e-14
ENSMUSG00000032135	Mcam	2.88405	0.000481852		ENSMUSG00000026014	Raph1	5.4602	7.06138e-36
ENSMUSG00000032281	Acsbg1	3.28872	4.45253e-16		ENSMUSG00000026070	Il18r1	2.79357	2.63174e-23
ENSMUSG00000033107	Rnf125	0.76737	0.0240958		ENSMUSG00000026155	Smap1	1.261	2.87945e-19
ENSMUSG00000033318	Gstt2	1.1909	0.00717104		ENSMUSG00000026427	Eif2d	0.891577	0.00030286
ENSMUSG00000034573	Ptpn13	3.97371	1.24817e-09		ENSMUSG00000026687	Aldh9a1	1.06442	8.29044e-08
ENSMUSG00000034777	Vax2	6.86573	0.000525172		ENSMUSG00000027009	Itga4	1.88796	1.10168e-13
ENSMUSG00000034792	Gna15	0.84211	2.19907e-07		ENSMUSG00000027456	Sdcbp2	3.52905	9.3924e-13
ENSMUSG00000034898	Filip1	2.66922	1.89196e-05		ENSMUSG00000027544	Nfatc2	0.48241	0.0186702
ENSMUSG00000036932	Aifm1	0.529423	0.000668781		ENSMUSG00000027809	Etfdh	0.972227	1.37043e-05
ENSMUSG00000039131	Gipc2	6.98504	0.000183665		ENSMUSG00000027843	Ptpn22	0.675731	7.03031e-05
ENSMUSG00000039234	Sec24d	0.912984	0.00534837		ENSMUSG00000028218	Fam92a	1.84408	0.000173636
ENSMUSG00000040274	Cdk6	0.918635	0.0029582		ENSMUSG00000028251	Tstd3	1.93836	6.7746e-32
ENSMUSG00000040680	Kremen2	3.26797	3.73957e-06		ENSMUSG00000028551	Cdkn2c	4.3515	3.44398e-32
ENSMUSG00000041959	S100a10	1.80656	2.61125e-13		ENSMUSG00000028931	Kcnab2	1.05369	6.24143e-19
ENSMUSG00000042312	S100a13	0.870876	0.00046382		ENSMUSG00000029026	Trp73	10.9481	1.73859e-10
ENSMUSG00000042671	Rgs8	7.37373	1.86553e-05		ENSMUSG00000029119	Man2b2	0.718986	4.70569e-07
ENSMUSG00000042784	Muc1	2.08171	0.00615711		ENSMUSG00000029121	Crmp1	5.14711	7.68502e-34
ENSMUSG00000044258	Ctla2a	3.08475	5.73095e-09		ENSMUSG00000029171	Pgm1	1.19709	1.03342e-18
ENSMUSG00000046876	Atxn1	1.84028	1.30127e-16		ENSMUSG00000029253	Cenpc1	1.13724	2.14879e-05
ENSMUSG00000048416	Mlf1	7.01334	0.00199354		ENSMUSG00000029276	Glmn	1.56228	2.73752e-05
ENSMUSG00000049109	Themis	1.93148	3.69563e-15		ENSMUSG00000029463	Fam216a	0.980784	0.0106769
ENSMUSG00000050232	Cxcr3	3.6012	3.45812e-20		ENSMUSG00000029658	Wdr95	4.11082	4.2052e-11
ENSMUSG00000051234	Rnf7	0.705706	0.00406906		ENSMUSG00000029759	Pon3	1.86374	0.00682791
ENSMUSG00000051359	Ncald	7.63055	1.44311e-08		ENSMUSG00000030064	Frmd4b	3.40548	4.93079e-49
ENSMUSG00000051735	Rinl	0.491486	4.60641e-05		ENSMUSG00000030148	Clec4a2	1.38937	0.000276029
ENSMUSG00000053044	Cd8b1	2.04475	6.70441e-09		ENSMUSG00000030616	Sytl2	3.12075	3.08721e-38
ENSMUSG00000053219	Raet1e	2.52698	0.000396923		ENSMUSG00000031479	Vps36	0.848462	2.17734e-14
ENSMUSG00000053898	Ech1	0.654129	0.00833927		ENSMUSG00000031556	Tm2d2	0.489985	0.00139632
ENSMUSG00000054342	Kcnn4	1.55852	2.43928e-08		ENSMUSG00000031871	Cdh5	4.84199	1.80916e-06
ENSMUSG00000054889	Dsp	3.77896	4.58217e-06		ENSMUSG00000032020	Ubash3b	1.97933	3.22844e-24
ENSMUSG00000055435	Maf	1.86909	8.16325e-07		ENSMUSG00000032046	Abhd12	0.444541	0.0262874
ENSMUSG00000058216	RP23-41B18.5	1.45184	0.00454706		ENSMUSG00000032135	Mcam	2.53102	0.00187971
ENSMUSG00000062963	Ufc1	0.689587	0.0027379		ENSMUSG00000032281	Acsbg1	1.68157	1.94775e-05
ENSMUSG00000064080	Fbln2	6.40064	1.34967e-05		ENSMUSG00000032336	Nptn	1.44284	7.43306e-12
ENSMUSG00000071648	Rom1	2.20792	2.13608e-08		ENSMUSG00000033107	Rnf125	0.946264	0.00125221
ENSMUSG00000074622	Mafb	0.799264	0.0445962		ENSMUSG00000033147	Slc22a15	3.65242	3.03899e-55
ENSMUSG00000076471	Trbv14	1.54901	0.000348848		ENSMUSG00000033530	Ttc7b	0.557074	0.0033603
ENSMUSG00000076473	Trbv16	1.84801	0.000833288		ENSMUSG00000034573	Ptpn13	5.75784	2.93565e-21
ENSMUSG00000076474	Trbv17	2.16507	3.68968e-05		ENSMUSG00000034777	Vax2	8.71793	2.64937e-06
ENSMUSG00000076475	Trbv19	1.89087	3.33099e-07		ENSMUSG00000034792	Gna15	3.19431	1.828e-88
ENSMUSG00000076480	Trbv29	2.16896	2.03365e-07		ENSMUSG00000034898	Filip1	7.18384	2.1646e-21
ENSMUSG00000076490	Trbc1	1.27096	0.00176116		ENSMUSG00000036932	Aifm1	1.09084	2.10355e-14
ENSMUSG00000076498	Trbc2	1.44429	0.00165988		ENSMUSG00000037465	Klf10	2.35591	3.6358e-26
ENSMUSG00000076508	Igkv17-127	1.28514	0.0392935		ENSMUSG00000039131	Gipc2	9.27345	1.20239e-07
ENSMUSG00000076540	Igkv4-80	8.67677	0.00154051		ENSMUSG00000039153	Runx2	5.11739	3.67259e-78
ENSMUSG00000076550	Igkv4-63	8.56062	6.66453e-05		ENSMUSG00000039234	Sec24d	2.10595	1.73507e-12
ENSMUSG00000076612	Ighg2c	6.85043	1.23863e-05		ENSMUSG00000039449	Prpf18	0.751524	5.19289e-13
ENSMUSG00000076615	Ighg3	6.39528	1.187e-06		ENSMUSG00000039621	Prex1	1.17937	2.1735e-07
ENSMUSG00000079173	Zan	8.45894	3.13924e-07		ENSMUSG00000040274	Cdk6	1.35297	2.1077e-06
ENSMUSG00000085133	RP24-84B10.1	4.59532	1.71774e-11		ENSMUSG00000040680	Kremen2	2.29619	0.000338365
ENSMUSG00000092329	AC114005.5	0.762674	1.57657e-09		ENSMUSG00000041959	S100a10	2.3271	2.89022e-22
ENSMUSG00000092486	RP23-3M10.7	2.21367	9.27825e-09		ENSMUSG00000042213	Zfand4	6.30173	3.60814e-32
ENSMUSG00000094194	Ighv5-16	8.87792	0.000407203		ENSMUSG00000042312	S100a13	1.60926	3.08093e-12
ENSMUSG00000094502	Ighv1-69	5.32104	5.9665e-05		ENSMUSG00000042671	Rgs8	10.0478	6.16484e-10
ENSMUSG00000094509	Ighv14-1	8.16977	0.00357199		ENSMUSG00000042705	Commd10	1.10466	4.97184e-06
ENSMUSG00000095335	Igkv3-5	9.876	2.44431e-08		ENSMUSG00000042784	Muc1	5.8703	8.5905e-08
ENSMUSG00000096255	Dynlt1b	0.709307	0.00644408		ENSMUSG00000044258	Ctla2a	5.60517	9.30505e-29
ENSMUSG00000096464	Ighv2-2	2.67436	0.0423907		ENSMUSG00000045679	Pqlc3	2.48383	1.80145e-119
					ENSMUSG00000046186	Cd109	9.55826	4.67377e-09
					ENSMUSG00000046324	Ermp1	1.08461	0.000302538
					ENSMUSG00000046410	Kcnk6	2.89705	1.09346e-22
					ENSMUSG00000046876	Atxn1	2.38911	1.8411e-29
					ENSMUSG00000047592	Nxpe5	2.79393	0.00169389
					ENSMUSG00000048416	Mlf1	4.40787	0.00455593
					ENSMUSG00000050232	Cxcr3	5.81251	5.5152e-53
					ENSMUSG00000051234	Rnf7	0.909976	7.03031e-05
					ENSMUSG00000051359	Ncald	9.6641	2.94995e-14
					ENSMUSG00000051457	Spn	1.2913	1.62036e-17
					ENSMUSG00000051864	Tbc1d22a	0.71925	2.51254e-09
					ENSMUSG00000052102	Gnpda1	2.17171	5.94866e-74
					ENSMUSG00000052117	RP23-334A5.4	3.59732	3.26045e-10
					ENSMUSG00000052428	Tmco1	1.52046	8.35709e-23
					ENSMUSG00000052906	Ubxn8	1.62904	1.90408e-11
					ENSMUSG00000053063	Clec12a	1.24074	0.00862109
					ENSMUSG00000053219	Raet1e	4.3041	0.0187208
					ENSMUSG00000053253	Ndfip2	0.804927	9.72591e-09
					ENSMUSG00000053898	Ech1	1.33443	2.80484e-09
					ENSMUSG00000054408	Spcs3	1.41972	5.58677e-22
					ENSMUSG00000054889	Dsp	6.06706	1.70314e-17
					ENSMUSG00000055435	Maf	4.20063	5.3388e-25
					ENSMUSG00000056888	Glipr1	1.54897	8.18589e-22
					ENSMUSG00000058216	RP23-41B18.5	1.06094	0.0303686
					ENSMUSG00000058997	Vwa8	0.726803	1.0221e-05
					ENSMUSG00000059316	Slc27a4	1.11657	3.69541e-10
					ENSMUSG00000062963	Ufc1	1.30491	6.89169e-10
					ENSMUSG00000065979	Cpped1	2.56039	1.91837e-18
					ENSMUSG00000067878	Map7d3	3.3978	4.08486e-09
					ENSMUSG00000071648	Rom1	3.04922	3.208e-16
					ENSMUSG00000074622	Mafb	2.78228	1.31333e-11
					ENSMUSG00000076474	Trbv17	1.17735	0.0126158
					ENSMUSG00000076475	Trbv19	0.869855	0.0122991
					ENSMUSG00000076508	Igkv17-127	4.47942	2.32804e-09
					ENSMUSG00000076534	Igkv12-89	7.03152	0.00569144
					ENSMUSG00000076540	Igkv4-80	7.03292	0.00818097
					ENSMUSG00000076550	Igkv4-63	5.60581	0.00934326
					ENSMUSG00000076556	Igkv4-57	2.7137	0.00979499
					ENSMUSG00000076577	Igkv8-30	3.24392	0.000119491
					ENSMUSG00000076609	Igkc	4.04897	9.25576e-10
					ENSMUSG00000076612	Ighg2c	13.3413	2.71626e-10
					ENSMUSG00000076613	Ighg2b	7.23894	3.64353e-05
					ENSMUSG00000076615	Ighg3	10.5752	6.18427e-08
					ENSMUSG00000076731	Ighv8-12	8.57137	0.0172965
					ENSMUSG00000076934	Iglv1	4.62115	0.0143571
					ENSMUSG00000079173	Zan	3.16832	5.73807e-09
					ENSMUSG00000081534	Slc48a1	1.08572	4.99793e-12
					ENSMUSG00000084817	AC121575.1	3.8163	0.00122345
					ENSMUSG00000085133	RP24-84B10.1	5.35051	1.1858e-25
					ENSMUSG00000090124	Ugt1a7c	1.42602	0.0014403
					ENSMUSG00000092329	AC114005.5	0.289332	0.0255786
					ENSMUSG00000092486	RP23-3M10.7	1.79972	1.62122e-06
					ENSMUSG00000093896	Ighv1-76	5.37786	0.00100827
					ENSMUSG00000094006	Igkv4-59	7.53173	0.000804925
					ENSMUSG00000094088	Ighv1-64	3.40125	8.9335e-05
					ENSMUSG00000094102	Ighv9-2	6.09163	0.0387796
					ENSMUSG00000094194	Ighv5-16	8.21964	0.000675862
					ENSMUSG00000094335	Igkv1-117	4.88534	1.07654e-09
					ENSMUSG00000094420	Igkv10-96	4.95279	4.98694e-17
					ENSMUSG00000094502	Ighv1-69	8.05871	1.20703e-05
					ENSMUSG00000094509	Ighv14-1	5.77527	0.019976
					ENSMUSG00000094787	Ighv1-54	2.85776	0.029243
					ENSMUSG00000094951	Ighv5-6	6.2434	0.0240028
					ENSMUSG00000095335	Igkv3-5	6.6389	0.000192315
					ENSMUSG00000096255	Dynlt1b	1.09809	5.05241e-06
					ENSMUSG00000096459	Ighv9-3	6.44609	0.0279773
					ENSMUSG00000096464	Ighv2-2	6.43612	0.000820871
					ENSMUSG00000096515	Igkv14-100	7.51994	0.0278729
					ENSMUSG00000098428	Anxa11-ps1	0.834038	0.0345579
